# Supplementary material for: Electroencephalographic Biomarkers for Treatment Response Prediction in Major Depressive Illness: A Meta-Analysis
Source: Atypon-hosted journal article supplement (doi:10.1176/appi.ajp.2018.17121358), 2018-10-03
Supplement: appi.ajp.2018.17121358.ds001.pdf [file appi.ajp.2018.17121358.ds001.pdf]

Data Supplement for Widge et al., Electroencephalographic Biomarkers for Treatment Response Prediction in Major Depressive Illness: A Meta-Analysis. Am J Psychiatry (doi: 10.1176/appi.ajp.2018.17121358)

## **Supplementary Methods**

### *Search Strategy and Article Selection*

We searched PubMed for articles published anytime before November 28, 2017 whose title and/or abstract contained keywords matching the query:

(electroencephalogram OR electroencephalography OR EEG OR QEEG OR event-related potential OR ERP OR cordance OR coherence OR spectral OR spectrum OR alpha OR beta OR theta OR delta OR gamma OR N1 OR P2 OR P300 OR N200 OR SSVEP OR VEP OR AEP OR evoked potential OR oscillation OR electrical activity)

AND

(depression OR depressive OR major depression OR major depressive disorder OR major depressive episode OR depressed OR antidepressant OR mood disorder)

AND

(differential OR predictor OR prediction OR predict OR biomarker OR marker OR phenotype OR response index)

AND

(response OR remission OR treatment response OR responsiveness OR nonresponse OR non-response OR responder OR non-responder OR therapeutic OR outcome OR treatment resistance OR comparative effectiveness OR effectiveness OR treatment selection OR efficacy)

The search was limited to articles in English and to human studies.

We then added additional articles known to one of the authors or identified through the references of recent reviews. We did not attempt to discover un-published data, as there is no single reasonable point of contact as there would be with a drug or therapeutic device manufacturer. Unpublished data from the authors of individual published studies may have technical flaws, as the acquisition and analysis of EEG is not straightforward.

All abstracts that appeared to involve EEG, treatment prediction, and some form of depressive illness were retained for further review. We did not consider abstracts or articles published as book chapters rather than in peer-reviewed journals. We removed an article from the analysis if, on detailed reading, it did not attempt to predict treatment response. We also removed two articles that, on careful inspection, were reports of the same marker as another article using a highly overlapping dataset. For these pairs (Cook2009 vs <sup>1</sup>, Leuchter2009 vs. <sup>2</sup>), we retained the article with the larger sample size. We retained articles that attempted prediction but found a non-significant result. We accepted one article that used magneto-encephalography (MEG) instead of EEG (Heikman 2001) on the grounds that the two techniques measure very similar signals.

This protocol was not pre-registered.

### *Data Extraction*

10 articles did not directly report the necessary information to reconstruct a 2x2 table enumerating false/true positives and negatives (Noda et al., 2017 ; van Dinteren et al., 2015 ; Arns et al., 2014 ; Widge et al., 2013 ; Narushima et al., 2010 ; Mulert et al., 2002 ; Pizzagalli et al., 2001 ; Bruder et al., 2001 ; Cook and Leuchter, 2001 ; Heikman et al., 2001). They did, however, provide sufficient additional information (e.g., a high-resolution ROC plot or all-subjects scatterplot) to infer it. For these studies, we computed diagnostic odds ratio (DOR) at every indicated point on the ROC, then assigned the study the 2x2 values that maximized its DOR. This gives each study the maximum "benefit of the doubt" in the meta-analysis. For studies that reported no association between any target QEEG feature and treatment response, we imputed table values assuming positive and negative predictive values equal to the prior probabilities of the patient sample. We did not identify discrepancies during this that required contact with the original investigators. We accepted each article's individual definition of (non)response, the threshold for which varied between authors. As with most of our design choices, this was meant to bias the meta-analysis in favor of detecting a signal if one exists.

For descriptive analysis, we extracted the type of treatment and the specific biomarker being studied. We coded treatments as medication vs. non-medication, rTMS vs. not, and SSRI vs. any other type of treatment. We further noted articles that used citalopram or venlafaxine as their primary medication, as these were the two most common treatments in the overall sample. For biomarkers, we classified them as resting state vs. task-based, and as calculated in cortical source space vs. sensor space. We coded which articles involved the most common biomarkers in our sample: event-related potentials, auditory evoked potentials, oscillatory asymmetry, oscillatory

power amplitude (theta and alpha), cordance, and the Antidepressant Treatment Response index. Each of these was studied in multiple papers, several by multiple investigators.

For study quality reporting, we extracted the total sample size (N), whether the analysis corrected for multiple hypothesis tests, and whether the analysis used any out-of-training-set cross-validation. N was the N reported for each study's EEG analysis, which often differed slightly from that reported in the abstract due to technical difficulties with a small number of EEG recordings. Any type of correction to the significance threshold was considered acceptable. We only required multiple-testing correction if the authors explicitly stated that they tested multiple frequency bands or biomarkers for their correlation with treatment response. For studies reporting analysis of a single biomarker at a single timepoint, we again granted the investigators the benefit of the doubt and treated these as hypothesis-driven studies. Similarly, any type of cross-validation was sufficient to count an article as positive, as long as the cross-validated results were reported in the body of the article. We explicitly chose not to rate articles against the QUADAS<sup>3</sup> or STARD<sup>4</sup> quality framework. Those models are designed to assess whether a new diagnostic test is being accurately compared against a gold standard. All of our articles used effectively the same gold standard: whether patients achieved a given percent change in a clinician-rated scale.

In a supplemental analysis, we repeated the main study extracting the standardized mean difference (Cohen's d) from each of the studied articles. When an article reported QEEG marker means and standard deviations for responders/non-responders, we used these directly. For articles reporting an area under the curve, we converted this to d using a published formula<sup>5</sup>. We

did the same for articles reporting a linear correlation coefficient (Pearson's  $r$ ) between a depressive rating scale and the QEEG biomarker, again using a published formula<sup>6</sup>. Finally, when neither of these were available, we estimated  $d$  from the 2x2 table using an online calculator<sup>7</sup>. We note that  $d$  and other standardized mean differences are not recommended by any statistical authority for use in meta-analysis of diagnostic markers. Collapsing sensitivity and specificity into a single marker ignores the tradeoff/negative correlation between those outcomes. In the case of  $d$ , it further assumes a normal distribution. We report this additional analysis mainly for comparison with other reports, e.g. Pizzagalli et al. 2011.

We did not explicitly extract or code details of the EEG recording (number of channels, the specific amplifier, sampling rate). There is no *a priori* reason why any of these should be related to a study's findings, assuming basic investigator competency. We did not explicitly code whether studies used a "pure" MDD sample vs. any type of depressive diagnosis, nor did we stratify them by response threshold. Depression is a heterogeneous diagnosis, and we have no clear evidence that MDD, "depression NOS", or depressed episodes in bipolar disorder differ in their neurobiology.

### *Meta-Analysis Procedures*

Diagnostic Odds Ratio (DOR), sensitivity, and specificity all may become undefined for studies with zero false positives/negatives. To prevent this, we added 0.5 to all 2x2 table values for all studies (including those that did not report a "perfect" discriminator).

Although we extracted data for specific subclasses of medications, our meta-regression considered only "Medication", "rTMS", and "Other" as treatment classes. More detailed models could not be fit to the dataset.

For standardized mean differences, we fit a univariate mixed-effects meta-analysis with inverse variance weighting, using metafor's "rma" function. The funnel plot for this regression plotted effect size against the reciprocal square root of sample size ( $1/\sqrt{n}$ ), as funnel plots based on this method are more robust against false-positive detection of asymmetry<sup>8</sup>.

## Supplementary Figures

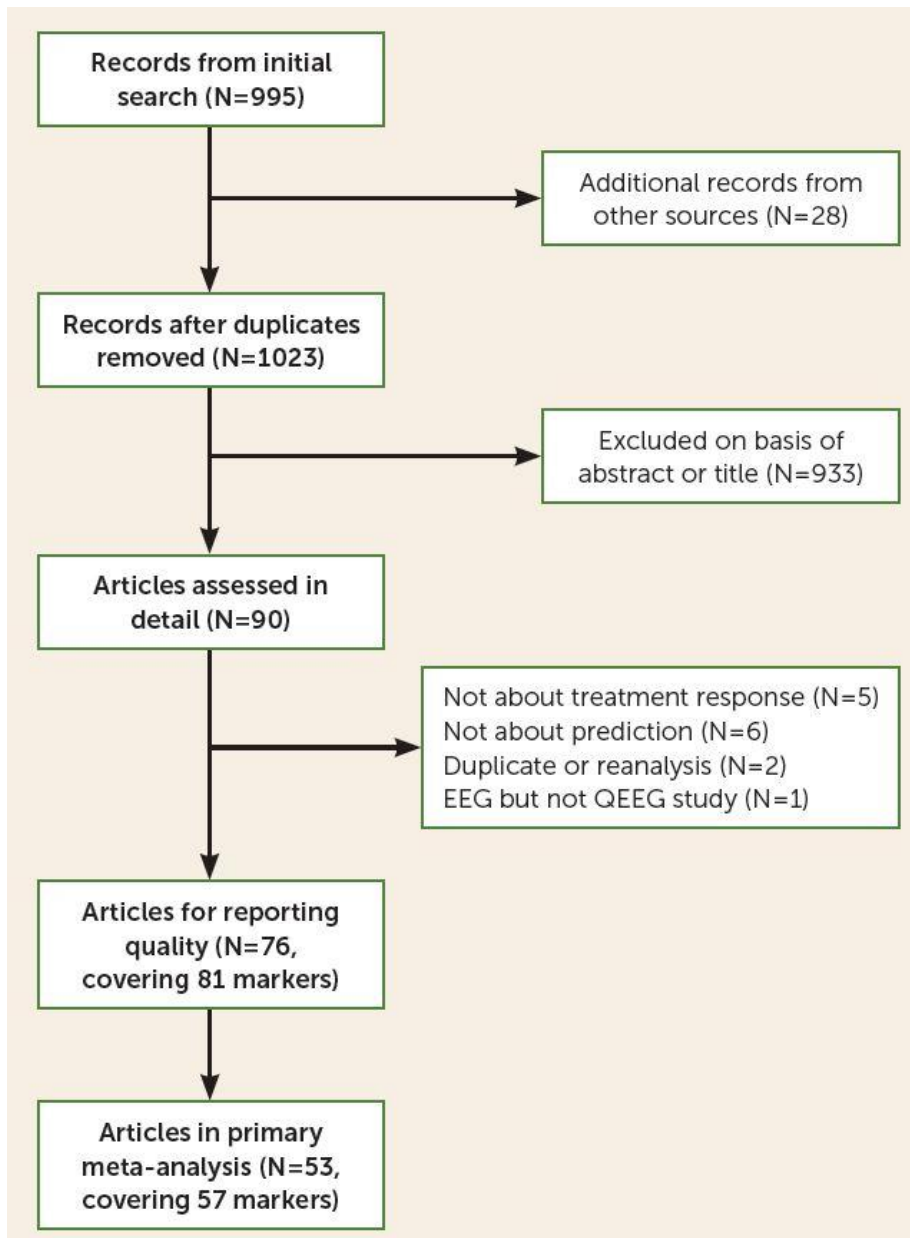

**FIGURE S1.** PRISMA Diagram for a Meta-Analysis of Quantitative EEG (QEEG) Biomarkers in Depression Treatment

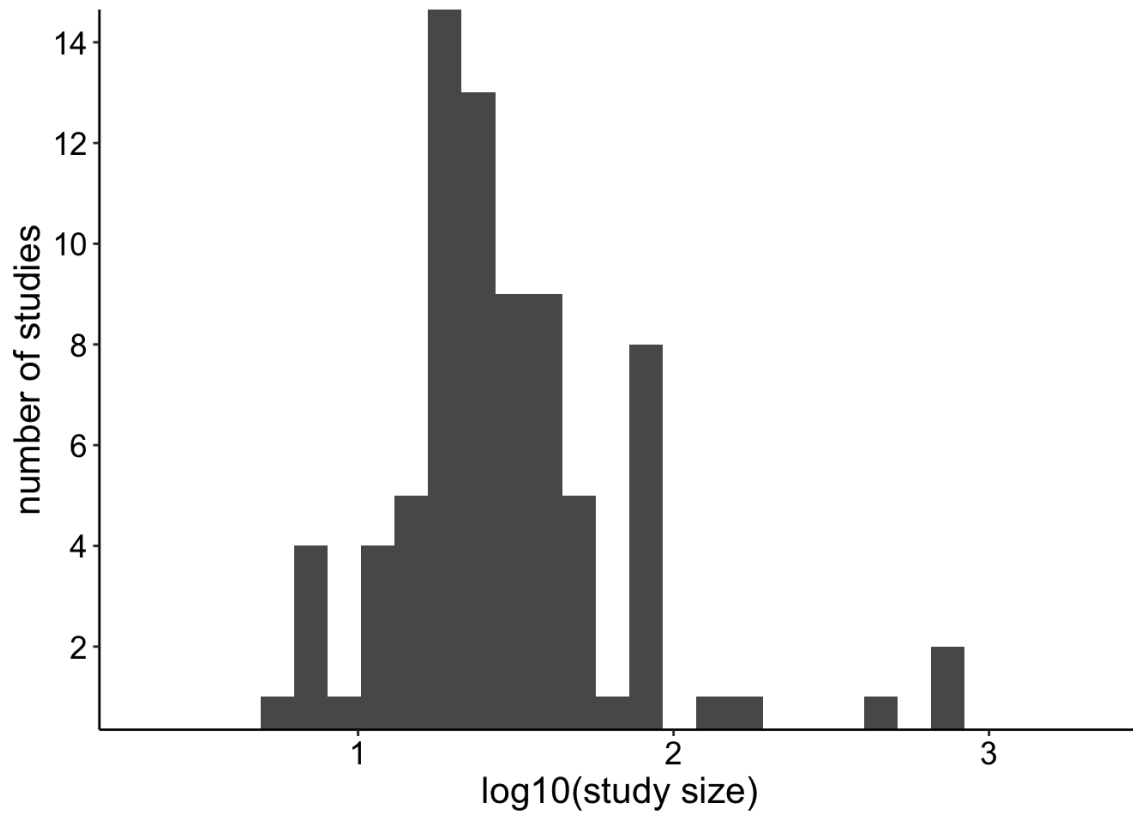

**FIGURE S2.** Histogram of study sizes, plotted on log scale due to presence of a few very large studies. Most were small, with the bulk of the distribution below  $N=100$  and the two largest modes at  $N=22$  and  $N=85$ .



**A**

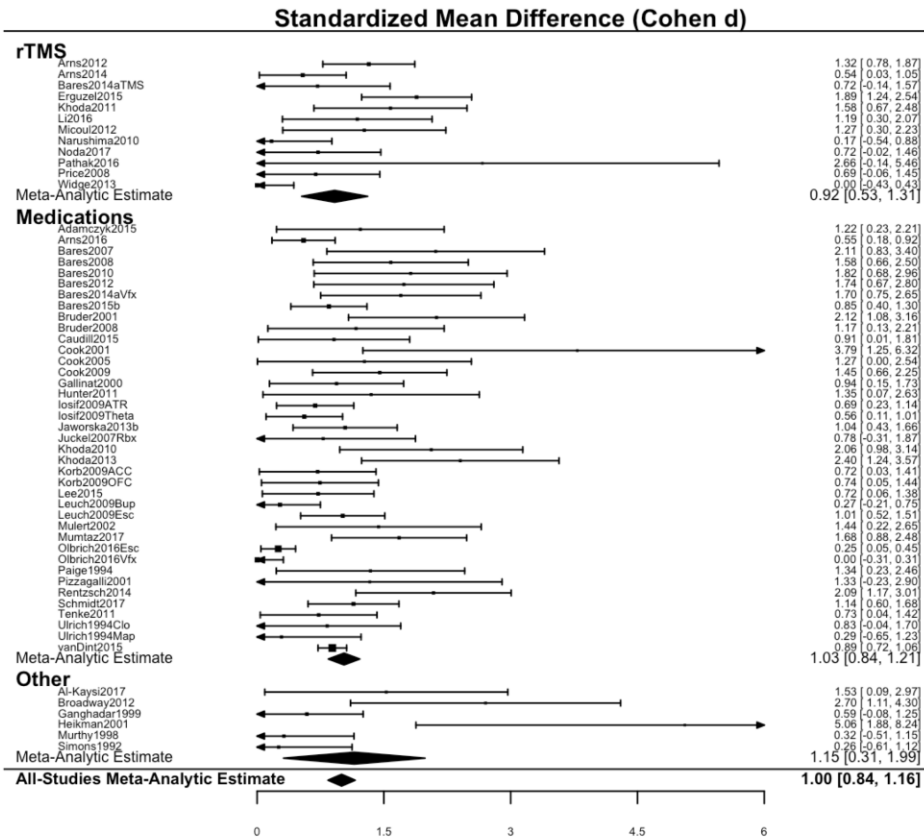

**B**

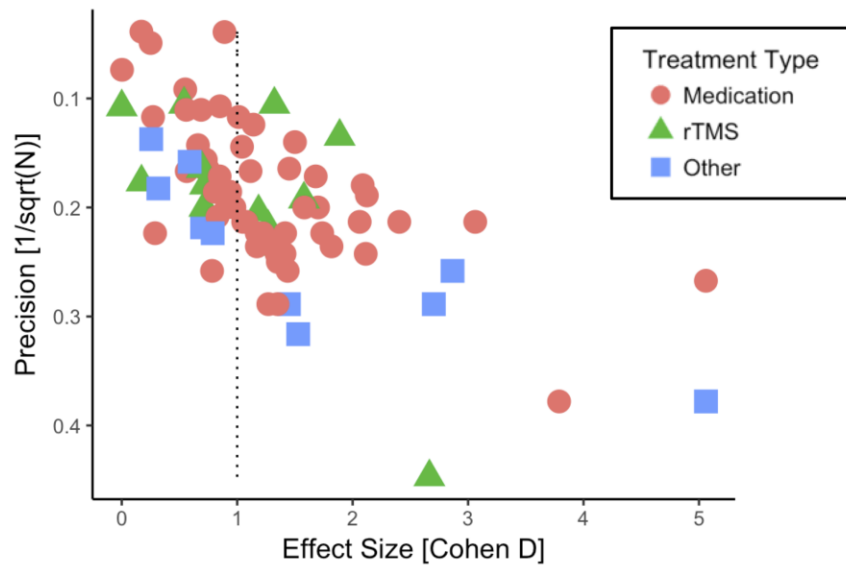

**FIGURE S3.** Meta-analysis of QEEG standardized mean differences (Cohen's d) between responders and non-responders. Data were extractable from 67 articles covering 72 putative

biomarkers. Most articles (21/24, 87.5%) that did not include 2x2 table information for the main meta-analysis did include information sufficient to compute  $d$ . Individual studies and their values are reported in Table S2 below. **(A)**, forest plot. The meta-analytic estimate of  $d=1$  (CI 0.84 to 1.16) is consistent with a "large" effect size and similar to that estimated by Pizzagalli (2011) for rostral theta power. **(B)**, funnel plot of effect size vs. precision (reciprocal of root of sample size). There is a strong asymmetry, with under-representation of studies having lower precision and correspondingly low effect sizes. Meta-regression of effect size vs. precision (analogue of Egger's test) had  $p=5.87e-7$ , consistent with the asymmetry in the main analysis.

## Supplementary Tables

**TABLE S1.** Studies included in meta-analysis, with report of quality metrics, study size, and predictive values. Empty cells represent data that were not reported and could not be imputed.

| First Author        | Year  | Journal                                                    | Treatment                                             | Marker                                              | Population | Mult Corr | Cross Val | N   | TP  | FP  | TN  | FN  | Sens | Spec | AUC  |
|---------------------|-------|------------------------------------------------------------|-------------------------------------------------------|-----------------------------------------------------|------------|-----------|-----------|-----|-----|-----|-----|-----|------|------|------|
| van Dinteren        | 2015  | European Neuropsychopharmacology                           | Escitalopram, sertraline, or venlafaxine-XR (iSPOT-D) | ERP latency and amplitude                           | MDD        | N         | N         | 655 | 316 | 100 | 139 | 100 | 0.76 | 0.58 |      |
| Arns                | 2016  | Clinical Neurophysiology                                   | Escitalopram, sertraline, or venlafaxine-XR (iSPOT-D) | occipital alpha power & frontal alpha asymmetry     | MDD        | Y         | N         | 119 | 31  | 15  | 47  | 26  | 0.54 | 0.76 | 0.64 |
| Woźniak-Kwaśniewska | 2015  | Journal of Affective Disorders                             | rTMS                                                  | prefrontal theta and beta power                     | MDD/BP     | Y         | N         | 18  |     |     |     |     |      |      |      |
| Arns                | 2015  | European Neuropsychopharmacology                           | Escitalopram, sertraline, or venlafaxine-XR (iSPOT-D) | frontal and rostral anterior cingulate (rACC) theta | MDD        | N/A       | N         | 667 |     |     |     |     |      |      |      |
| Lee                 | 2015  | International Journal of Molecular Sciences                | Escitalopram, sertraline, or paroxetine               | LDAEP, source localized                             | MDD        | N/A       | N         | 41  | 16  | 5   | 11  | 9   | 0.64 | 0.69 |      |
| Caudill             | 2015  | Clinical EEG and Neuroscience                              | Reboxetine                                            | ATR 4.1                                             | MDD        | N/A       | N         | 25  | 12  | 1   | 7   | 5   | 0.71 | 0.88 | 0.74 |
| Canali              | 2014  | Bipolar Disorders                                          | Sleep deprivation                                     | Cortical excitability to TMS                        | BP         | N/A       | N         | 21  |     |     |     |     |      |      |      |
| Bares               | 2015b | European Archives of Psychiatry and Clinical Neurosciences | Any antidepressant                                    | Prefrontal theta cordance                           | MDD        | N         | N         | 87  | 40  | 7   | 32  | 8   | 0.83 | 0.82 | 0.91 |

|                      |           |                                                                                                                 |                                  |                                           |                  |     |     |    |    |    |    |    |      |      |      |
|----------------------|-----------|-----------------------------------------------------------------------------------------------------------------|----------------------------------|-------------------------------------------|------------------|-----|-----|----|----|----|----|----|------|------|------|
| Bares                | 2015a Vfx | Clinical EEG and Neuroscience                                                                                   | Venlafaxine                      | Prefrontal theta cordance                 | MDD              | N/A | N   | 25 | 10 | 4  | 11 | 0  | 1.00 | 0.73 | 0.89 |
| Bares                | 2015a TMS | Clinical EEG and Neuroscience                                                                                   | low frequency TMS                | Prefrontal theta cordance                 | MDD              | N/A | N   | 25 | 9  | 6  | 10 | 0  | 1.00 | 0.63 | 0.75 |
| Arns                 | 2014      | Clinical Neurophysiology                                                                                        | rTMS                             | Non-linear complexity metrics, alpha band | MDD              | N/A | N   | 90 | 70 | 15 | 5  | 0  | 1.00 | 0.27 | 0.70 |
| Quraan               | 2014      | Neuropsychopharmacology                                                                                         | Cg25 Deep brain stimulation      | Theta and alpha frontal asymmetry         | MDD              | Y   | N   | 12 |    |    |    |    |      |      |      |
| Widge                | 2013      | Brain Stimulation                                                                                               | rTMS                             | ATR 4.1                                   | MDD              | N/A | N/A | 86 | 19 | 19 | 24 | 24 | 0.50 | 0.50 | 0.50 |
| Hunter               | 2013      | Journal of Neuropsychiatry and Clinical Neurosciences                                                           | Sertraline                       | rACC theta current density (LORETA)       | MDD              | N/A | N   | 22 |    |    |    |    |      |      |      |
| Khodayari-Rostamabad | 2013      | Clinical Neurophysiology                                                                                        | Any SSRI                         | Multi-marker weighted                     | MDD              | N/A | Y   | 22 | 6  | 1  | 14 | 1  | 0.81 | 0.95 |      |
| Jaworska             | 2013a     | European Neuropsychopharmacology                                                                                | Escitalopram, bupropion, or both | auditory oddball ERP                      | MDD              | Y   | N   | 49 |    |    |    |    |      |      |      |
| Jaworska             | 2013b     | Progress in neuropsychopharmacology and biological psychiatry                                                   | Escitalopram, bupropion, or both | LDAEP                                     | MDD              | Y   | N   | 48 | 15 | 3  | 22 | 8  | 0.65 | 0.88 |      |
| Arns                 | 2012      | Brain Stimulation                                                                                               | rTMS                             | Multi-marker weighted                     | MDD or dysthymia | Y   | N   | 90 | 63 | 9  | 11 | 7  | 0.90 | 0.55 | 0.81 |
| Khodayari-Rostamabad | 2011      | Conference Proceedings: Annual International Conference of the IEEE Engineering in Medicine and Biology Society | rTMS                             | Multi-marker weighted                     | MDD              | N   | Y   | 27 | 7  | 3  | 15 | 2  | 0.78 | 0.83 |      |
| Micoulaud-Franchi    | 2012      | Journal of Affective Disorders                                                                                  | rTMS                             | alpha power                               | MDD/BP           | Y   | N   | 21 | 12 | 3  | 6  | 0  | 1.00 | 0.66 | 0.82 |
| Bares                | 2012      | Journal of Psychiatric Research                                                                                 | Any antidepressant               | Prefrontal theta cordance                 | BP               | N/A | N   | 20 | 7  | 2  | 10 | 1  | 0.88 | 0.83 | 0.80 |

|                      |      |                                                                                                                 |                                     |                                         |                            |     |   |    |    |    |    |    |      |      |      |
|----------------------|------|-----------------------------------------------------------------------------------------------------------------|-------------------------------------|-----------------------------------------|----------------------------|-----|---|----|----|----|----|----|------|------|------|
| Tenke                | 2011 | Biological Psychiatry                                                                                           | SSRI or SI                          | multi-electrode alpha power             | MDD, dysthymia, or dep NOS | N/A | N | 41 | 14 | 1  | 12 | 14 | 0.50 | 0.92 |      |
| Khodayari-Rostamabad | 2010 | Conference Proceedings: Annual International Conference of the IEEE Engineering in Medicine and Biology Society | Any SSRI                            | Multi-marker weighted                   | MDD                        | N   | Y | 22 | 7  | 2  | 12 | 1  | 0.88 | 0.86 |      |
| Spronk               | 2011 | Journal of Affective Disorders                                                                                  | Any antidepressant                  | Theta power, auditory ERP               | MDD                        | N   | N | 25 |    |    |    |    |      |      |      |
| Bares                | 2010 | European Neuropsychopharmacology                                                                                | Bupropion                           | prefrontal EEG theta cordance           | MDD                        | N/A | N | 18 | 9  | 1  | 6  | 2  | 0.82 | 0.86 |      |
| Salvadore            | 2010 | Neuropsychopharmacology                                                                                         | Ketamine                            | Pregenual ACC activity and connectivity | MDD                        | N/A | N | 15 |    |    |    |    |      |      |      |
| Narushima            | 2010 | Journal of Neuropsychiatry and Clinical Neurosciences                                                           | rTMS                                | subgenual ACC theta power               | Vascular Depression        | N   | N | 32 | 3  | 0  | 16 | 10 | 0.88 | 0.86 | 0.55 |
| Wang                 | 2009 | Chinese Medical Journal                                                                                         | Any antidepressant                  | Auditory ERP                            | Any depression             | N   | N | 36 |    |    |    |    |      |      |      |
| Cook                 | 2009 | Psychiatry Research                                                                                             | Fluoxetine or venlafaxine           | frontal theta cordance and power        | MDD                        | N   | N | 37 | 10 | 10 | 16 | 1  | 0.90 | 0.60 | 0.76 |
| Leuchter             | 2009 | Psychiatry Research                                                                                             | Escitalopram                        | ATR 4.1                                 | MDD                        | N/A | N | 73 | 22 | 3  | 32 | 16 | 0.58 | 0.91 | 0.77 |
| Leuchter             | 2009 | Psychiatry Research                                                                                             | Bupropion                           | ATR4.1                                  | MDD                        | N/A | N | 73 | 20 | 18 | 25 | 10 | 0.88 | 0.86 |      |
| Iosifescu            | 2009 | European Neuropsychopharmacology                                                                                | SSRI or venlafaxine                 | Theta Cordance                          | MDD                        | N/A | N | 82 | 28 | 16 | 21 | 17 | 0.62 | 0.57 | 0.66 |
| Iosifescu            | 2009 | European Neuropsychopharmacology                                                                                | SSRI or venlafaxine                 | ATR 4.1                                 | MDD                        | N/A | N | 82 | 37 | 17 | 20 | 8  | 0.82 | 0.54 | 0.72 |
| Korb                 | 2009 | Clinical Neurophysiology                                                                                        | Fluoxetine, venlafaxine, or placebo | mOFC theta current density              | MDD                        | N/A | N | 37 | 16 | 6  | 9  | 6  | 0.73 | 0.60 | 0.69 |
| Korb                 | 2009 | Clinical Neurophysiology                                                                                        | Fluoxetine, venlafaxine, or placebo | rACC theta current density              | MDD                        | N/A | N | 37 | 14 | 5  | 10 | 8  | 0.64 | 0.67 | 0.71 |

|            |          |                                 |                            | (LORETA)                             |                |     |     |     |     |    |    |    |      |      |      |  |
|------------|----------|---------------------------------|----------------------------|--------------------------------------|----------------|-----|-----|-----|-----|----|----|----|------|------|------|--|
| Price      | 2008     | Clinical EEG and Neuroscience   | rTMS                       | alpha power, frequency, asymmetry    | MDD            | N/A | N/A | 37  | 5   | 13 | 14 | 5  | 0.50 | 0.52 |      |  |
| Spronk     | 2008     | Clinical EEG and Neuroscience   | rTMS                       | Auditory oddball and alpha asymmetry | MDD            | N   | N   | 8   |     |    |    |    |      |      |      |  |
| Bares      | 2008     | European Psychiatry             | Venlafaxine                | Prefrontal theta cordance            | MDD            | N   | N   | 25  | 11  | 5  | 8  | 1  | 0.92 | 0.62 |      |  |
| Bruder     | 2008     | Biological Psychiatry           | Fluoxetine                 | Alpha power and asymmetry, occipital | Any depression | N/A | N   | 18  | 9   | 2  | 5  | 2  | 0.82 | 0.71 |      |  |
| Mulert     | 2007     | Journal of Affective Disorders  | Citalopram or reboxetine   | rACC theta current density, LDAEP    | MDD            | N   | N   | 17  |     |    |    |    |      |      |      |  |
| Bares      | 2007     | Journal of Psychiatric Research | Any antidepressant         | theta cordance                       | MDD            | N/A | N   | 17  | 5   | 2  | 10 | 0  | 1.00 | 0.83 |      |  |
| Linka      | 2005     | Pharmacopsychiatry              | Reboxetine                 | LDAEP                                | Any depression | N/A | N   | 14  |     |    |    |    |      |      |      |  |
| Linka      | 2004     | Neuroscience Letters            | Citalopram                 | LDAEP                                | MDD            | N   | N   | 16  |     |    |    |    |      |      |      |  |
| Kalayam    | 2003     | American Journal of Psychiatry  | Citalopram                 | frontal error-related negativity     | Geriatric MDD  | Y   | N   | 22  |     |    |    |    |      |      |      |  |
| Mulert     | 2002     | Clinical Neurophysiology        | Citalopram                 | LDAEP, source localized              | MDD            | N/A | N   | 15  | 9   | 1  | 4  | 1  | 0.90 | 0.80 | 0.88 |  |
| Pizzagalli | 2001     | American Journal of Psychiatry  | Nortriptyline              | rACC theta current density (LORETA)  | MDD            | N   | N   | 18  | 16  | 0  | 2  | 0  | 1.00 | 1.00 |      |  |
| Gallinat   | 2000     | Psychopharmacology              | any SSRI                   | LDAEP                                | MDD            | N/A | N   | 29  | 9   | 6  | 11 | 3  | 0.75 | 0.65 |      |  |
| Olbrich    | 2016 Esc | Journal of Psychiatric Research | escitalopram or sertraline | Vigilance (VIGALL)                   | MDD            | N/A | N   | 414 | 192 | 91 | 60 | 71 | 0.73 | 0.40 |      |  |
| Olbrich    | 2016 Vfx | Journal of Psychiatric Research | Venlafaxine                | Vigilance (VIGALL)                   | MDD            | N/A | N   | 184 |     |    |    |    |      |      |      |  |
| Adamczyk   | 2015     | Journal of                      | any                        | theta                                | Any            | N/A | N   | 20  | 5   | 1  | 11 | 3  | 0.63 | 0.92 | 0.90 |  |

|          |          |                                                           |                             |                                            |                   |     |     |    |    |   |    |   |      |      |      |  |
|----------|----------|-----------------------------------------------------------|-----------------------------|--------------------------------------------|-------------------|-----|-----|----|----|---|----|---|------|------|------|--|
|          |          | Psychiatric Research                                      | antidepressant              | cordance                                   | depression        |     |     |    |    |   |    |   |      |      |      |  |
| Erguzel  | 2015     | Psychiatry Investigation                                  | rTMS                        | delta and theta cordance                   | MDD               | N/A | Y   | 55 | 28 | 5 | 20 | 2 | 0.93 | 0.80 | 0.89 |  |
| Rentsch  | 2014     | European Archives of Psychiatry and Clinical Neuroscience | any antidepressant          | source-localized power                     | MDD               | Y   | N   | 31 | 9  | 0 | 20 | 2 | 0.82 | 1.00 | 0.93 |  |
| Hunter   | 2011     | Journal of clinical neurophysiology                       | Fluoxetine                  | ATR 4.1                                    | MDD               | N/A | N   | 12 | 12 | 4 | 8  | 0 | 1.00 | 0.67 | 0.83 |  |
| Juckel   | 2007 Cit | Journal of Clinical Psychiatry                            | Citalopram                  | LDAEP, source localized                    | MDD               | N/A | N/A | 20 |    |   |    |   |      |      |      |  |
| Juckel   | 2007 Rbx | Journal of Clinical Psychiatry                            | reboxetine                  | LDAEP, source localized                    | MDD               | N/A | N/A | 15 | 3  | 4 | 5  | 3 | 0.50 | 0.56 |      |  |
| Cook     | 2005     | Journal of Psychiatric Research                           | any medication              | Prefrontal theta cordance                  | MDD               | N/A | N   | 12 | 5  | 2 | 4  | 1 | 0.83 | 0.67 |      |  |
| Bruder   | 2001     | Biological Psychiatry                                     | Fluoxetine                  | alpha asymmetry                            | MDD, female       | N/A | N   | 28 | 20 | 2 | 5  | 1 | 0.95 | 0.71 |      |  |
| Cook     | 2001     | Seminars in clinical neuropsychiatry                      | SSRI or venlafaxine         | Prefrontal theta cordance                  | MDD               | N/A | N   | 7  | 4  | 0 | 3  | 0 | 1.00 | 1.00 |      |  |
| Heikman  | 2001     | Journal of ECT                                            | ECT                         | delta and theta MEG power and scalp ratios | MDD               | N   | N   | 7  | 5  | 0 | 2  | 0 | 1.00 | 1.00 |      |  |
| Knott    | 2000     | Pharmacopsychiatry                                        | paroxetine                  | power and coherence, multiple bands        | MDD               | N   | N   | 51 |    |   |    |   |      |      |      |  |
| Broadway | 2012     | Neuropsychopharmacology                                   | Cg25 Deep brain stimulation | theta cordance                             | MDD or bipolar II | N/A | N   | 12 | 5  | 0 | 6  | 1 | 0.83 | 1.00 | 0.97 |  |
| Al-Kaysi | 2017     | Journal of Affective Disorders                            | tDCS                        | Multi-marker weighted                      | MDD               | N   | Y   | 10 | 4  | 1 | 4  | 1 | 0.76 | 0.76 |      |  |
| Li       | 2016     | Cerebral Cortex                                           | rTMS                        | Prefrontal theta power after task          | MDD               | N/A | N   | 24 | 10 | 3 | 9  | 2 | 0.83 | 0.77 | 0.80 |  |
| Mumtaz   | 2017     | PLoS ONE                                                  | Any SSRI                    | Multi-marker weighted                      | MDD               | N/A | Y   | 34 | 15 | 4 | 14 | 1 | 0.95 | 0.80 |      |  |
| Noda     | 2017     | Clinical Neurophysiology                                  | rTMS                        | Gamma power, theta-gamma                   | MDD               | Y   | N   | 31 | 10 | 3 | 12 | 6 | 0.65 | 0.82 | 0.70 |  |

|            |      |                                               |                                      |                                          |                  |     |   |    |    |    |    |    |       |       |       |
|------------|------|-----------------------------------------------|--------------------------------------|------------------------------------------|------------------|-----|---|----|----|----|----|----|-------|-------|-------|
|            |      |                                               |                                      | coupling                                 |                  |     |   |    |    |    |    |    |       |       |       |
| Pathak     | 2016 | Frontiers in Neural Circuits                  | rTMS                                 | Gamma and delta power and connectivity   | MDD              | N   | N | 5  | 4  | 0  | 1  | 0  | 1.00  | 1.00  |       |
| Schmidt    | 2017 | Scientific Reports                            | Any antidepressant                   | Vigilance (VIGALL)                       | MDD              | N/A | N | 65 | 22 | 9  | 27 | 7  | 0.77  | 0.74  | 0.79  |
| Ganghadar  | 1999 | Journal of Affective Disorders                | ECT                                  | Fractal dimension post-ECT               | MDD, melancholic | N/A | N | 40 | 18 | 4  | 11 | 7  | 0.714 | 0.727 | 0.773 |
| Staedt     | 1998 | Journal of Affective Disorders                | Tricyclic antidepressant             | Sleep architecture (cluster disturbance) | MDD              | N   | N | 20 |    |    |    |    |       |       |       |
| Murthy     | 1998 | Journal of Affective Disorders                | Sudarshan Kriya Yoga                 | auditory oddball ERP                     | MDD or dysthymia | N/A | N | 30 | 11 | 4  | 4  | 11 | 0.50  | 0.50  |       |
| Knott      | 1996 | Journal of Affective Disorders                | Imipramine                           | Multi-electrode multi-band power         | MDD              | N   | N | 29 |    |    |    |    |       |       |       |
| Luthringer | 1995 | Biological Psychiatry                         | MAO or SSRI                          | Mean frequency of spectral peak          | MDD              | N   | N | 0  |    |    |    |    |       |       |       |
| Ulrich     | 1994 | Journal of Affective Disorders                | Clomipramine                         | Alpha power distribution                 | MDD/BP           | N   | N | 23 | 6  | 2  | 9  | 6  | 0.50  | 0.82  |       |
| Ulrich     | 1994 | Journal of Affective Disorders                | Maprotiline                          | Alpha power distribution                 | MDD/BP           | N   | N | 20 | 3  | 4  | 9  | 4  | 0.43  | 0.69  |       |
| Paige      | 1994 | Neuropsychobiology                            | Multiple antidepressant              | LDAEP                                    | MDD              | N/A | N | 17 | 8  | 0  | 6  | 3  | 0.73  | 1.00  | 0.848 |
| Kupfer     | 1989 | Psychiatry Research                           | Clomipramine                         | Delta power during sleep                 | MDD              | Y   | N | 0  |    |    |    |    |       |       |       |
| Kasper     | 1988 | Psychiatry Research                           | Sleep deprivation                    | Auditory ERP                             | Any depression   | Y   | N | 20 |    |    |    |    |       |       |       |
| Frank      | 1984 | Psychiatry Research                           | Imipramine and interpersonal therapy | REM latency                              | Any depression   | N   | N | 34 |    |    |    |    |       |       |       |
| Kupfer     | 1981 | American Journal of Psychiatry                | Amitriptyline                        | REM latency                              | MDD              | N   | N | 0  |    |    |    |    |       |       |       |
| Paige      | 1995 | Psychopharmacology Bulletin                   | Bupropion                            | LDAEP                                    | MDD              | N/A | N | 8  |    |    |    |    |       |       |       |
| Simons     | 1992 | Journal of Consulting and Clinical Psychology | cognitive-behavioral therapy         | REM latency                              | endogenous MDD   | N/A | N | 33 | 20 | 13 | 10 | 10 | 0.67  | 0.43  |       |

Mult Corr, study reported (or did not report) correction for multiple hypothesis testing.



Cross Val, study did (or did not) use cross validation to verify proposed biomarkers.

ACC, anterior cingulate cortex. ATR, Antidepressant Treatment Response index. BP, bipolar disorder. ECT, electroconvulsive therapy. EEG, electroencephalogram. ERP, event-related potential. iSPOT-D, International Study to Predict Optimized Treatment of Depression. LDAEP, loudness dependence of the auditory evoked potential. LORETA, low resolution electrical tomography. MDD, major depressive disorder. MEG, Magnetoencephalography. NOS, not otherwise specified. rACC, rostral anterior cingulate cortex. rTMS, repetitive transcranial magnetic stimulation. SNRI, selective norepinephrine reuptake inhibitor. SSRI, selective serotonin reuptake inhibitor. TMS, transcranial magnetic stimulation.

**TABLE S2.** Studies included in meta-analysis of standard mean differences (Cohen's d), with necessary input variables when available. Abbreviations follow Table S1. Resp, responder. NResp, non-responder.

| First Author         | Year      | Journal                                                    | Treatment                                             | Marker                                              | Resp Mean | Resp SD | NResp Mean | NResp SD | Cohen's d |
|----------------------|-----------|------------------------------------------------------------|-------------------------------------------------------|-----------------------------------------------------|-----------|---------|------------|----------|-----------|
| van Dinteren         | 2015      | European Neuropsychopharmacology                           | Escitalopram, sertraline, or venlafaxine-XR (iSPOT-D) | ERP latency and amplitude                           |           |         |            |          | 0.890     |
| Arns                 | 2016      | Clinical Neurophysiology                                   | Escitalopram, sertraline, or venlafaxine-XR (iSPOT-D) | occipital alpha power & frontal alpha asymmetry     |           |         |            |          | 0.550     |
| Woźniak-Kwaśniewska  | 2015      | Journal of Affective Disorders                             | rTMS                                                  | prefrontal theta and beta power                     | 2260.000  | 961.332 | 3260.000   | 613.769  | 1.240     |
| Arns                 | 2015      | European Neuropsychopharmacology                           | Escitalopram, sertraline, or venlafaxine-XR (iSPOT-D) | frontal and rostral anterior cingulate (rACC) theta |           |         |            |          | 0.170     |
| Lee                  | 2015      | International Journal of Molecular Sciences                | Escitalopram, sertraline, or paroxetine               | LDAEP, source localized                             | 1.470     | 0.830   | 0.950      | 0.590    | 0.722     |
| Caudill              | 2015      | Clinical EEG and Neuroscience                              | Reboxetine                                            | ATR 4.1                                             |           |         |            |          | 0.910     |
| Canali               | 2014      | Bipolar Disorders                                          | Sleep deprivation                                     | Cortical excitability to TMS                        |           |         |            |          | 0.696     |
| Bares                | 2015b     | European Archives of Psychiatry and Clinical Neurosciences | Any antidepressant                                    | Prefrontal theta cordance                           | 0.070     | 0.200   | -0.100     | 0.200    | 0.850     |
| Bares                | 2015a Vfx | Clinical EEG and Neuroscience                              | Venlafaxine                                           | Prefrontal theta cordance                           | -0.130    | 0.100   | 0.040      | 0.100    | 1.700     |
| Bares                | 2015a TMS | Clinical EEG and Neuroscience                              | low frequency TMS                                     | Prefrontal theta cordance                           | -0.130    | 0.100   | 0.030      | 0.300    | 0.716     |
| Arns                 | 2014      | Clinical Neurophysiology                                   | rTMS                                                  | Non-linear complexity metrics, alpha band           | -0.002    | 0.007   | 0.002      | 0.005    | 0.540     |
| Quraan               | 2014      | Neuropsychopharmacology                                    | Cg25 Deep brain stimulation                           | Theta and alpha frontal asymmetry                   | 0.360     | 0.710   | -0.600     | 0.612    | 1.448     |
| Widge                | 2013      | Brain Stimulation                                          | rTMS                                                  | ATR 4.1                                             |           |         |            |          |           |
| Hunter               | 2013      | Journal of Neuropsychiatry and Clinical Neurosciences      | Sertraline                                            | rACC theta current density (LORETA)                 | 0.370     | 0.340   | 1.310      | 0.270    | 3.062     |
| Khodayari-Rostamabad | 2013      | Clinical Neurophysiology                                   | Any SSRI                                              | Multi-marker weighted                               | 0.189     | 0.081   | 0.348      | 0.066    | 2.404     |

|                      |            |                                                                                                                 |                                  |                                         |        |        |        |        |       |
|----------------------|------------|-----------------------------------------------------------------------------------------------------------------|----------------------------------|-----------------------------------------|--------|--------|--------|--------|-------|
| Jaworska             | 2013a      | European Neuropsychopharmacology                                                                                | Escitalopram, bupropion, or both | auditory oddball ERP                    | 10.000 | 4.589  | 7.000  | 4.500  | 0.660 |
| Jaworska             | 2013b      | Progress in neuro-psychopharmacology and biological psychiatry                                                  | Escitalopram, bupropion, or both | LDAEP                                   | 4.750  | 2.700  | 2.350  | 1.825  | 1.041 |
| Arns                 | 2012       | Brain Stimulation                                                                                               | rTMS                             | Multi-marker weighted                   |        |        |        |        | 1.322 |
| Khodayari-Rostamabad | 2011       | Conference Proceedings: Annual International Conference of the IEEE Engineering in Medicine and Biology Society | rTMS                             | Multi-marker weighted                   |        |        |        |        | 1.578 |
| Micoulaud-Franchi    | 2012       | Journal of Affective Disorders                                                                                  | rTMS                             | alpha power                             |        |        |        |        | 1.268 |
| Bares                | 2012       | Journal of Psychiatric Research                                                                                 | Any antidepressant               | Prefrontal theta cordance               |        |        |        |        | 1.737 |
| Tenke                | 2011       | Biological Psychiatry                                                                                           | SSRI or SI                       | multi-electrode alpha power             |        |        |        |        | 0.728 |
| Khodayari-Rostamabad | 2010       | Conference Proceedings: Annual International Conference of the IEEE Engineering in Medicine and Biology Society | Any SSRI                         | Multi-marker weighted                   |        |        |        |        | 2.061 |
| Spronk               | 2011       | Journal of Affective Disorders                                                                                  | Any antidepressant               | Theta power, auditory ERP               |        |        |        |        | 0.976 |
| Bares                | 2010       | European Neuropsychopharmacology                                                                                | Bupropion                        | prefrontal EEG theta cordance           |        |        |        |        | 1.817 |
| Salvadore            | 2010       | Neuropsychopharmacology                                                                                         | Ketamine                         | Pregenual ACC activity and connectivity |        |        |        |        | 2.865 |
| Narushima            | 2010       | Journal of Neuropsychiatry and Clinical Neurosciences                                                           | rTMS                             | subgenual ACC theta power               |        |        |        |        | 0.171 |
| Wang                 | 2009       | Chinese Medical Journal                                                                                         | Any antidepressant               | Auditory ERP                            |        |        |        |        | 0.563 |
| Cook                 | 2009       | Psychiatry Research                                                                                             | Fluoxetine or venlafaxine        | frontal theta cordance and power        | -1.140 | 0.770  | -0.030 | 0.760  | 1.451 |
| Leuchter             | 2009 Esc   | Psychiatry Research                                                                                             | Escitalopram                     | ATR 4.1                                 | 59.000 | 10.200 | 49.800 | 7.800  | 1.013 |
| Leuchter             | 2009 Bup   | Psychiatry Research                                                                                             | Bupropion                        | ATR4.1                                  | 50.100 | 10.300 | 53.000 | 11.100 | 0.271 |
| Iosifescu            | 2009 Theta | European Neuropsychopharmacology                                                                                | SSRI or venlafaxine              | Theta Cordance                          | 21.100 | 4.400  | 23.700 | 4.900  | 0.558 |

|            |             |                                                                 |                                        |                                         |        |        |        |        |       |
|------------|-------------|-----------------------------------------------------------------|----------------------------------------|-----------------------------------------|--------|--------|--------|--------|-------|
| Iosifescu  | 2009<br>ATR | European<br>Neuropsychopharmacology                             | SSRI or venlafaxine                    | ATR 4.1                                 | 56.100 | 11.400 | 48.700 | 10.100 | 0.687 |
| Korb       | 2009<br>OFC | Clinical Neurophysiology                                        | Fluoxetine, venlafaxine, or<br>placebo | mOFC theta current density              | -1.932 | 0.253  | -2.107 | 0.216  | 0.744 |
| Korb       | 2009<br>ACC | Clinical Neurophysiology                                        | Fluoxetine, venlafaxine, or<br>placebo | rACC theta current density<br>(LORETA)  | -1.890 | 0.228  | -2.046 | 0.207  | 0.716 |
| Price      | 2008        | Clinical EEG and<br>Neuroscience                                | rTMS                                   | alpha power, frequency,<br>asymmetry    | 0.140  | 0.240  | -0.030 | 0.250  | 0.694 |
| Spronk     | 2008        | Clinical EEG and<br>Neuroscience                                | rTMS                                   | Auditory oddball and alpha<br>asymmetry |        |        |        |        |       |
| Bares      | 2008        | European Psychiatry                                             | Venlafaxine                            | Prefrontal theta cordance               |        |        |        |        | 1.581 |
| Bruder     | 2008        | Biological Psychiatry                                           | Fluoxetine                             | Alpha power and<br>asymmetry, occipital | 1.750  | 0.470  | 1.200  | 0.470  | 1.170 |
| Mulert     | 2007        | Journal of Affective<br>Disorders                               | Citalopram or reboxetine               | rACC theta current density,<br>LDAEP    |        |        |        |        | 1.410 |
| Bares      | 2007        | Journal of Psychiatric<br>Research                              | Any antidepressant                     | theta cordance                          |        |        |        |        | 2.113 |
| Linka      | 2005        | Pharmacopsychiatry                                              | Reboxetine                             | LDAEP                                   |        |        |        |        | 5.060 |
| Linka      | 2004        | Neuroscience Letters                                            | Citalopram                             | LDAEP                                   |        |        |        |        | 1.352 |
| Kalayam    | 2003        | American Journal of<br>Psychiatry                               | Citalopram                             | frontal error-related<br>negativity     | -4.840 | 1.840  | -8.120 | 4.010  | 1.051 |
| Mulert     | 2002        | Clinical Neurophysiology                                        | Citalopram                             | LDAEP, source localized                 | 1.530  | 0.890  | 0.410  | 0.650  | 1.437 |
| Pizzagalli | 2001        | American Journal of<br>Psychiatry                               | Nortriptyline                          | rACC theta current density<br>(LORETA)  | -3.350 | 0.060  | -3.430 | 0.060  | 1.333 |
| Gallinat   | 2000        | Psychopharmacology                                              | any SSRI                               | LDAEP                                   |        |        |        |        | 0.940 |
| Olbrich    | 2016<br>Esc | Journal of Psychiatric<br>Research                              | escitalopram or sertraline             | Vigilance (VIGALL)                      |        |        |        |        | 0.250 |
| Olbrich    | 2016<br>Vfx | Journal of Psychiatric<br>Research                              | Venlafaxine                            | Vigilance (VIGALL)                      |        |        |        |        | 0.002 |
| Adamczyk   | 2015        | Journal of Psychiatric<br>Research                              | any antidepressant                     | theta cordance                          | -2.030 | 0.870  | -2.840 | 0.350  | 1.222 |
| Erguzel    | 2015        | Psychiatry Investigation                                        | rTMS                                   | delta and theta cordance                |        |        |        |        | 1.887 |
| Rentsch    | 2014        | European Archives of<br>Psychiatry and Clinical<br>Neuroscience | any antidepressant                     | source-localized power                  |        |        |        |        | 2.087 |
| Hunter     | 2011        | Journal of clinical<br>neurophysiology                          | Fluoxetine                             | ATR 4.1                                 |        |        |        |        | 1.349 |
| Juckel     | 2007<br>Cit | Journal of Clinical<br>Psychiatry                               | Citalopram                             | LDAEP, source localized                 |        |        |        |        | 1.169 |

|            |             |                                      |                             |                                            |        |       |       |       |  |       |
|------------|-------------|--------------------------------------|-----------------------------|--------------------------------------------|--------|-------|-------|-------|--|-------|
| Juckel     | 2007<br>Rbx | Journal of Clinical Psychiatry       | reboxetine                  | LDAEP, source localized                    |        |       |       |       |  | 0.782 |
| Cook       | 2005        | Journal of Psychiatric Research      | any medication              | Prefrontal theta cordance                  |        |       |       |       |  | 1.270 |
| Bruder     | 2001        | Biological Psychiatry                | Fluoxetine                  | alpha asymmetry                            |        |       |       |       |  | 2.123 |
| Cook       | 2001        | Seminars in clinical neuropsychiatry | SSRI or venlafaxine         | Prefrontal theta cordance                  | -0.465 | 0.099 | 0.090 | 0.182 |  | 3.788 |
| Heikman    | 2001        | Journal of ECT                       | ECT                         | delta and theta MEG power and scalp ratios |        |       |       |       |  | 5.060 |
| Knott      | 2000        | Pharmacopsychiatry                   | paroxetine                  | power and coherence, multiple bands        |        |       |       |       |  | 1.500 |
| Broadway   | 2012        | Neuropsychopharmacology              | Cg25 Deep brain stimulation | theta cordance                             |        |       |       |       |  | 2.703 |
| Al-Kaysi   | 2017        | Journal of Affective Disorders       | tDCS                        | Multi-marker weighted                      |        |       |       |       |  | 1.529 |
| Li         | 2016        | Cerebral Cortex                      | rTMS                        | Prefrontal theta power after task          |        |       |       |       |  | 1.185 |
| Mumtaz     | 2017        | PLoS ONE                             | Any SSRI                    | Multi-marker weighted                      |        |       |       |       |  | 1.680 |
| Noda       | 2017        | Clinical Neurophysiology             | rTMS                        | Gamma power, theta-gamma coupling          |        |       |       |       |  | 0.721 |
| Pathak     | 2016        | Frontiers in Neural Circuits         | rTMS                        | Gamma and delta power and connectivity     |        |       |       |       |  | 2.665 |
| Schmidt    | 2017        | Scientific Reports                   | Any antidepressant          | Vigilance (VIGALL)                         |        |       |       |       |  | 1.141 |
| Ganghadar  | 1999        | Journal of Affective Disorders       | ECT                         | Fractal dimension post-ECT                 | 1.070  | 0.086 | 1.030 | 0.043 |  | 0.588 |
| Staedt     | 1998        | Journal of Affective Disorders       | Tricyclic antidepressant    | Sleep architecture (cluster disturbance)   |        |       |       |       |  | 1.415 |
| Murthy     | 1998        | Journal of Affective Disorders       | Sudarshan Kriya Yoga        | auditory oddball ERP                       | 7.400  | 3.800 | 7.600 | 5.000 |  | 0.317 |
| Knott      | 1996        | Journal of Affective Disorders       | Imipramine                  | Multi-electrode multi-band power           |        |       |       |       |  | 0.806 |
| Luthringer | 1995        | Biological Psychiatry                | MAO or SSRI                 | Mean frequency of spectral peak            | 6.910  | 1.750 | 8.500 | 2.420 |  | 1.115 |
| Ulrich     | 1994<br>Clo | Journal of Affective Disorders       | Clomipramine                | Alpha power distribution                   |        |       |       |       |  | 0.829 |
| Ulrich     | 1994<br>Map | Journal of Affective Disorders       | Maprotiline                 | Alpha power distribution                   |        |       |       |       |  | 0.289 |
| Paige      | 1994        | Neuropsychobiology                   | Multiple antidepressant     | LDAEP                                      | 0.301  | 0.183 | 0.076 | 0.151 |  | 1.341 |
| Kupfer     | 1989        | Psychiatry Research                  | Clomipramine                | Delta power during sleep                   |        |       |       |       |  |       |

|        |      |                                               |                                      |              |  |  |  |  |       |
|--------|------|-----------------------------------------------|--------------------------------------|--------------|--|--|--|--|-------|
| Kasper | 1988 | Psychiatry Research                           | Sleep deprivation                    | Auditory ERP |  |  |  |  | 0.787 |
| Frank  | 1984 | Psychiatry Research                           | Imipramine and interpersonal therapy | REM latency  |  |  |  |  | 0.847 |
| Kupfer | 1981 | American Journal of Psychiatry                | Amitriptyline                        | REM latency  |  |  |  |  | 1.079 |
| Paige  | 1995 | Psychopharmacology Bulletin                   | Bupropion                            | LDAEP        |  |  |  |  |       |
| Simons | 1992 | Journal of Consulting and Clinical Psychology | cognitive-behavioral therapy         | REM latency  |  |  |  |  | 0.255 |

**TABLE S3.** Meta-regression coefficients for the bivariate meta-analytic model, estimating differential effects of specific biomarkers. p-values are from Z-test on regression coefficients. Two coefficients reach significance for being more specific than QEEG overall. The Akaike Information Criterion increases, however, from -115.66 for the all-studies model to -104.11 for this meta-regression model. This indicates that the significant coefficient represent over-fitting rather than a true effect.

| Marker          | Sens   | Sens (SE) | Sens (p)     | Spec  | Spec (SE) | Spec (p)     |
|-----------------|--------|-----------|--------------|-------|-----------|--------------|
| Intercept       | 0.691  | 0.042     | <b>0.000</b> | 0.567 | 0.050     | 0.213        |
| Alpha Power     | 0.041  | 0.347     | 0.636        | 0.050 | 0.337     | 0.589        |
| Alpha Asymmetry | -0.011 | 0.356     | 0.910        | 0.089 | 0.339     | 0.367        |
| ATR             | -0.029 | 0.337     | 0.721        | 0.089 | 0.327     | 0.283        |
| Cordance        | 0.120  | 0.336     | 0.065        | 0.170 | 0.314     | <b>0.015</b> |
| LDAEP           | -0.010 | 0.344     | 0.906        | 0.153 | 0.330     | 0.096        |
| Multivariate    | 0.128  | 0.359     | 0.167        | 0.250 | 0.320     | <b>0.005</b> |
| Theta Power     | 0.013  | 0.346     | 0.879        | 0.128 | 0.331     | 0.161        |

Sens, sensitivity ; Spec, specificity ; SE, standard error of regression coefficient; p, p-value.

**TABLE S4.** Meta-regression coefficients for the bivariate meta-analytic model, estimating differential ability of QEEG to predict the response to specific treatments. p-values are from Z-test on regression coefficients. The coefficients for medication and rTMS are non-significant, suggesting no greater predictive power for either treatment class.

| <b>Marker</b>     | <b>Sens</b> | <b>Sens (SE)</b> | <b>Sens (p)</b> | <b>Spec</b> | <b>Spec (SE)</b> | <b>Spec (p)</b> |
|-------------------|-------------|------------------|-----------------|-------------|------------------|-----------------|
| <b>Intercept</b>  | 0.678       | 0.064            | <b>0.032</b>    | 0.631       | 0.078            | 0.173           |
| <b>Medication</b> | 0.045       | 0.337            | 0.565           | 0.067       | 0.343            | 0.470           |
| <b>rTMS</b>       | 0.059       | 0.349            | 0.507           | 0.011       | 0.355            | 0.919           |

Sens, sensitivity ; Spec, specificity ; SE, standard error of regression coefficient; p, p-value.



## Supplementary References

1. Cook IA, Leuchter AF, Morgan M, et al. Early changes in prefrontal activity characterize clinical responders to antidepressants. *Neuropsychopharmacology*. 2002;27(1):120-131. doi:10.1016/S0893-133X(02)00294-4
2. Cook IA, Hunter AM, Gilmer WS, et al. Quantitative electroencephalogram biomarkers for predicting likelihood and speed of achieving sustained remission in major depression: a report from the Biomarkers for Rapid Identification of Treatment Effectiveness in Major Depression (BRITE-MD) trial. *J Clin Psychiatry*. 2013;74(1):51–56.
3. Whiting PF, Rutjes AW, Westwood ME, et al. QUADAS-2: a revised tool for the quality assessment of diagnostic accuracy studies. *Ann Intern Med*. 2011;155(8):529–536.
4. Bossuyt PM, Reitsma JB, Bruns DE, et al. The STARD statement for reporting studies of diagnostic accuracy: explanation and elaboration. *Ann Intern Med*. 2003;138(1):W1-12. doi:10.7326/0003-4819-138-1-200301070-00012-w1
5. Ruscio J. A probability-based measure of effect size: Robustness to base rates and other factors. *Psychol Methods*. 2008;13(1):19-30. doi:10.1037/1082-989X.13.1.19
6. Borenstein M, Hedges LV, Higgins JPT, Rothstein HR, eds. Effect sizes based on means. In: *Introduction to Meta-Analysis*. Chichester, U.K: John Wiley & Sons; 2009.
7. Wilson DB. Practical meta-analysis effect size calculator. Campbell Collaboration. <https://www.campbellcollaboration.org/research-resources/research-for-resources/effect-size-calculator.html>. Accessed May 1, 2018.
8. Zwetsloot P-P, Van Der Naald M, Sena ES, et al. Standardized mean differences cause funnel plot distortion in publication bias assessments. *eLife*. 2017;6. doi:10.7554/eLife.24260
